# Supplementary material for: Water cycle changes in Czechia: a multi-source water budget perspective
Source: Copernicus journal article supplement (doi:10.5194/hess-28-1-2024), 2024-01-02
Supplement: Supplementary file 1 [file hess-28-1-2024-supplement.pdf]

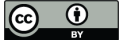

*Supplement of*

## **Water cycle changes in Czechia: a multi-source water budget perspective**

**Mijael Rodrigo Vargas Godoy et al.**

*Correspondence to:* Mijael Rodrigo Vargas Godoy ([vargas\\_godoy@fzp.czu.cz](mailto:vargas_godoy@fzp.czu.cz))

The copyright of individual parts of the supplement might differ from the article licence.

**Table S1.** Compiled from Sahoo et al. (2011).  $P$  is precipitation,  $E$  is evapotranspiration,  $Q$  is runoff, and  $\Delta$  TWS is changes in total water storage.

| Name        | Variable     | Spatial Resolution | Temporal Resolution | Record Length | Data Type       | Reference(s)                 |
|-------------|--------------|--------------------|---------------------|---------------|-----------------|------------------------------|
| GPCP        | $P$          | 1°                 | Daily               | 1997-2006     | Satellite-based | Adler et al. (2003)          |
| TMPA 3B42RT | $P$          | 0.25°              | 3h                  | 1997-2019     | Satellite-based | Huffman et al. (2007)        |
| CMORPH      | $P$          | 8km                | 30min               | 2003-2006     | Satellite-based | Joyce et al. (2004)          |
| PERSIANN    | $P$          | 0.25°              | 3h                  | 2000-2006     | Satellite-based | Hong et al. (2004)           |
| CPC PRECL   | $P$          | 2.5°               | Monthly             | 1950-Present  | Gauge-based     | Chen et al. (2002)           |
| CRU TS3.0   | $P$          | 0.5°               | Monthly             | 1901-2006     | Gauge-based     | Mitchell and Jones (2005)    |
| WM v2.01    | $P$          | 0.5°               | Monthly             | 1900-2008     | Gauge-based     | Willmott and Matsuura (2001) |
| GPCC        | $P$          | 0.5°               | Monthly             | 1900-2007     | Gauge-based     | Schneider et al. (2011)      |
| PM (ISCCP)  | $E$          | 2.5°               | 3h                  | 1984-2005     | Satellite-based | Sheffield et al. (2010)      |
| PM (EOS)    | $E$          | 5km                | Daily               | 2003-2006     | Satellite-based | Vinukollu et al. (2011)      |
| PT (EOS)    | $E$          | 5km                | Daily               | 2003-2006     | Satellite-based | Vinukollu et al. (2011)      |
| SEBS (EOS)  | $E$          | 5km                | Daily               | 2003-2006     | Satellite-based | Vinukollu et al. (2011)      |
| VIC         | $E$          | 1.0°               | 3h                  | 1948-2006     | Model           | Sheffield and Wood (2007)    |
| ERA-interim | $E$          | T255               | 12h                 | 1989-2006     | Reanalysis      | Simmons (2006)               |
| GRACE       | $\Delta$ TWS | Basin              | ~Monthly            | 2002-2006     | Satellite-based | Swenson and Wahr (2006)      |
| GRDC        | $Q$          | Basin              | Monthly             | 1900-2006     | Station         | www.bafg.de/GRDC             |

**Table S2.** Compiled from Pan et al. (2012).  $P$  is precipitation,  $E$  is evapotranspiration,  $Q$  is runoff, and  $\Delta$  TWS is changes in total water storage.

| Name       | Variable     | Spatial Resolution | Temporal Resolution | Record Length | Data Type        | Reference(s)                 |
|------------|--------------|--------------------|---------------------|---------------|------------------|------------------------------|
| GPCP v2.2  | $P$          | 2.5°               | Monthly             | 1950-Present  | Gauge-based      | Adler et al. (2003)          |
| CRU TS3.0  | $P$          | 0.5°               | Monthly             | 1901-2006     | Gauge-based      | Mitchell and Jones (2005)    |
| WM v2.01   | $P$          | 0.5°               | Monthly             | 1900-2008     | Gauge-based      | Willmott and Matsuura (2001) |
| GPCC       | $P$          | 0.5°               | Monthly             | 1900-2007     | Gauge-based      | Schneider et al. (2011)      |
| MPI        | $E$          | 0.5°               | Monthly             | 1982-2008     | Flux tower-based | Jung et al. (2010)           |
| SEBS (EOS) | $E$          | 5km                | Daily               | 2003-2006     | Satellite-based  | Vinukollu et al. (2011)      |
| GRACE      | $\Delta$ TWS | Basin              | ~Monthly            | 2002-2006     | Satellite-based  | Swenson and Wahr (2006)      |
| GRDC       | $Q$          | Basin              | Monthly             | 1900-2006     | Station          | www.bafg.de/GRDC             |

| Ranking | P Data       | E Data       | Q Data       |
|---------|--------------|--------------|--------------|
| 1st     | TerraClimate | TerraClimate | TerraClimate |
| 2nd     | mHM          | mHM          | mHM          |
| 3rd     | CRU TS v4.06 | TerraClimate | TerraClimate |
| 4th     | TerraClimate | TerraClimate | mHM          |
| 5th     | CRU TS v4.06 | TerraClimate | mHM          |
| 6th     | ERA5-Land    | ERA5-Land    | ERA5-Land    |
| 7th     | mHM          | mHM          | TerraClimate |
| 8th     | PREC/L       | mHM          | mHM          |
| 9th     | mHM          | TerraClimate | mHM          |
| 10th    | PREC/L       | TerraClimate | TerraClimate |
| 11th    | mHM          | TerraClimate | TerraClimate |
| 12th    | CRU TS v4.06 | mHM          | mHM          |
| 13th    | TerraClimate | mHM          | mHM          |
| 14th    | PREC/L       | mHM          | TerraClimate |
| 15th    | PREC/L       | TerraClimate | mHM          |
| 16th    | CRU TS v4.06 | mHM          | TerraClimate |
| 17th    | TerraClimate | mHM          | TerraClimate |
| 18th    | ERA5-Land    | ERA5-Land    | mHM          |
| 19th    | CRU TS v4.06 | ERA5-Land    | TerraClimate |
| 20th    | TerraClimate | ERA5-Land    | TerraClimate |
| 21st    | mHM          | ERA5-Land    | mHM          |
| 22nd    | TerraClimate | ERA5-Land    | mHM          |
| 23rd    | CRU TS v4.06 | ERA5-Land    | mHM          |
| 24th    | ERA5-Land    | TerraClimate | mHM          |
| 25th    | ERA5-Land    | TerraClimate | ERA5-Land    |
| 26th    | mHM          | ERA5-Land    | TerraClimate |
| 27th    | ERA5-Land    | ERA5-Land    | TerraClimate |
| 28th    | TerraClimate | mHM          | ERA5-Land    |
| 29th    | CRU TS v4.06 | mHM          | ERA5-Land    |
| 30th    | PREC/L       | ERA5-Land    | mHM          |
| 31st    | PREC/L       | ERA5-Land    | TerraClimate |
| 32nd    | ERA5-Land    | TerraClimate | TerraClimate |
| 33rd    | TerraClimate | TerraClimate | ERA5-Land    |
| 34th    | mHM          | mHM          | ERA5-Land    |
| 35th    | CRU TS v4.06 | TerraClimate | ERA5-Land    |
| 36th    | ERA5-Land    | mHM          | mHM          |
| 37th    | mHM          | TerraClimate | ERA5-Land    |
| 38th    | ERA5-Land    | NCEP/NCAR R1 | mHM          |
| 39th    | ERA5-Land    | mHM          | ERA5-Land    |
| 40th    | mHM          | ERA5-Land    | ERA5-Land    |
| 41st    | TerraClimate | ERA5-Land    | ERA5-Land    |
| 42nd    | CRU TS v4.06 | ERA5-Land    | ERA5-Land    |
| 43rd    | ERA5-Land    | NCEP/NCAR R1 | TerraClimate |
| 44th    | ERA5-Land    | mHM          | TerraClimate |
| 45th    | mHM          | NCEP/NCAR R1 | mHM          |
| 46th    | CRU TS v4.06 | NCEP/NCAR R1 | TerraClimate |
| 47th    | TerraClimate | NCEP/NCAR R1 | TerraClimate |
| 48th    | PREC/L       | mHM          | ERA5-Land    |
| 49th    | mHM          | NCEP/NCAR R1 | TerraClimate |
| 50th    | TerraClimate | NCEP/NCAR R1 | mHM          |
| 51st    | CRU TS v4.06 | NCEP/NCAR R1 | mHM          |
| 52nd    | PREC/L       | ERA5-Land    | ERA5-Land    |
| 53rd    | PREC/L       | TerraClimate | ERA5-Land    |
| 54th    | PREC/L       | NCEP/NCAR R1 | TerraClimate |
| 55th    | PREC/L       | NCEP/NCAR R1 | mHM          |
| 56th    | ERA5-Land    | NCEP/NCAR R1 | ERA5-Land    |
| 57th    | ERA5-Land    | TerraClimate | NCEP/NCAR R1 |
| 58th    | NCEP/NCAR R1 | ERA5-Land    | ERA5-Land    |
| 59th    | mHM          | NCEP/NCAR R1 | ERA5-Land    |
| 60th    | ERA5-Land    | mHM          | NCEP/NCAR R1 |
| 61st    | TerraClimate | NCEP/NCAR R1 | ERA5-Land    |
| 62nd    | CRU TS v4.06 | NCEP/NCAR R1 | ERA5-Land    |
| 63rd    | ERA5-Land    | ERA5-Land    | NCEP/NCAR R1 |
| 64th    | PREC/L       | NCEP/NCAR R1 | ERA5-Land    |
| 65th    | NCEP/NCAR R1 | TerraClimate | NCEP/NCAR R1 |
| 66th    | CRU TS v4.06 | TerraClimate | NCEP/NCAR R1 |
| 67th    | TerraClimate | TerraClimate | NCEP/NCAR R1 |
| 68th    | mHM          | TerraClimate | NCEP/NCAR R1 |
| 69th    | CRU TS v4.06 | ERA5-Land    | NCEP/NCAR R1 |
| 70th    | mHM          | ERA5-Land    | NCEP/NCAR R1 |
| 71st    | CRU TS v4.06 | mHM          | NCEP/NCAR R1 |
| 72nd    | mHM          | mHM          | NCEP/NCAR R1 |
| 73rd    | TerraClimate | ERA5-Land    | NCEP/NCAR R1 |
| 74th    | TerraClimate | mHM          | NCEP/NCAR R1 |
| 75th    | NCEP/NCAR R1 | mHM          | NCEP/NCAR R1 |
| 76th    | PREC/L       | TerraClimate | NCEP/NCAR R1 |
| 77th    | PREC/L       | ERA5-Land    | NCEP/NCAR R1 |
| 78th    | NCEP/NCAR R1 | TerraClimate | ERA5-Land    |
| 79th    | PREC/L       | mHM          | NCEP/NCAR R1 |
| 80th    | NCEP/NCAR R1 | mHM          | ERA5-Land    |
| 81st    | NCEP/NCAR R1 | ERA5-Land    | mHM          |
| 82nd    | NCEP/NCAR R1 | ERA5-Land    | NCEP/NCAR R1 |
| 83rd    | NCEP/NCAR R1 | NCEP/NCAR R1 | ERA5-Land    |
| 84th    | NCEP/NCAR R1 | NCEP/NCAR R1 | mHM          |
| 85th    | NCEP/NCAR R1 | ERA5-Land    | TerraClimate |
| 86th    | NCEP/NCAR R1 | mHM          | mHM          |
| 87th    | NCEP/NCAR R1 | NCEP/NCAR R1 | NCEP/NCAR R1 |
| 88th    | NCEP/NCAR R1 | NCEP/NCAR R1 | TerraClimate |
| 89th    | NCEP/NCAR R1 | TerraClimate | mHM          |
| 90th    | NCEP/NCAR R1 | mHM          | TerraClimate |
| 91st    | NCEP/NCAR R1 | TerraClimate | TerraClimate |
| 92nd    | PREC/L       | NCEP/NCAR R1 | NCEP/NCAR R1 |
| 93rd    | ERA5-Land    | NCEP/NCAR R1 | NCEP/NCAR R1 |
| 94th    | mHM          | NCEP/NCAR R1 | NCEP/NCAR R1 |
| 95th    | TerraClimate | NCEP/NCAR R1 | NCEP/NCAR R1 |
| 96th    | CRU TS v4.06 | NCEP/NCAR R1 | NCEP/NCAR R1 |

Figure S1. Data set ranking as determined by Equation 3, where  $P$  is precipitation,  $E$  is evapotranspiration, and  $Q$  is runoff.

**Table S3.** Compiled from Rodell et al. (2015). *P* is precipitation, *E* is evapotranspiration, *Q* is runoff, and  $\Delta$  TWS is changes in total water storage.

| Name                            | Variable     | Spatial Resolution | Temporal Resolution | Record Length | Data Type       | Reference(s)                                                          |
|---------------------------------|--------------|--------------------|---------------------|---------------|-----------------|-----------------------------------------------------------------------|
| GPCP v2.2                       | <i>P</i>     | 1°                 | Daily               | 1997-2006     | Satellite-based | Adler et al. (2003)<br>Huffman et al. (2009)                          |
| Princeton ET                    | <i>E</i>     | 5km                | Daily               | 2003-2006     | Satellite-based | Vinukollu et al. (2011)                                               |
| MERRA and MERRA-Land            | <i>E</i>     | 0.5°x0.667°        | Hourly              | 1980-2016     | Reanalysis      | Rienecker et al. (2011)<br>Bosilovich et al. (2011)<br>Reichle (2012) |
| GLDAS                           | <i>E</i>     | 0.25°              | 3h                  | 1948-2014     | Model           | Roderick et al. (2014)                                                |
| University of Washington runoff | <i>Q</i>     | 2°                 | Monthly             | 1998–2008     | Model           | Jung et al. (2010)                                                    |
| GRACE                           | $\Delta$ TWS | Basin              | ~Monthly            | 2002-2006     | Satellite-based | Swenson and Wahr (2006)                                               |

**Table S4.** Compiled from Zhang et al. (2016). *P* is precipitation, *E* is evapotranspiration, *Q* is runoff, and  $\Delta$  TWS is changes in total water storage.

| Name          | Variable     | Spatial Resolution | Temporal Resolution | Record Length | Data Type       | Reference(s)                    |
|---------------|--------------|--------------------|---------------------|---------------|-----------------|---------------------------------|
| CSU           | <i>P</i>     | 0.25°              | 3h                  | 1998–2010     | Satellite-based | Bytheway and Kummerow (2013)    |
| PGF           | <i>P</i>     | 0.25°              | 3h                  | 1948–2010     | Satellite-based | Sheffield et al. (2006)         |
| CHIRPS        | <i>P</i>     | 0.5°               | Monthly             | 1981–present  | Satellite-based | Funk et al. (2014)              |
| GPCC(v6)      | <i>P</i>     | 0.5°               | Monthly             | 1901–2010     | Gauge-based     | Schneider et al. (2014)         |
| TMPA-RT       | <i>P</i>     | 0.25°              | Monthly             | 2001-2019     | Satellite-based | Huffman et al. (2007, 2010)     |
| SRB–PGF–PM    | <i>E</i>     | 0.5°               | 3h                  | 1984–2007     | Satellite-based | Vinukollu et al. (2011)         |
| VIC           | <i>E</i>     | 0.25°              | 3h                  | 1948-2010     | Model           | Sheffield and Wood (2007)       |
| ERA-interim   | <i>E</i>     | T255               | 12h                 | 1989-2006     | Reanalysis      | Simmons (2006)                  |
| MERRA         | <i>E</i>     | 0.5°x0.667°        | Hourly              | 1980-2016     | Reanalysis      | Rienecker et al. (2011)         |
| GLEAM         | <i>E</i>     | 0.5°               | 3h                  | 1984-2017     | Satellite-based | Gonzalez Miralles et al. (2011) |
| SRB-CFSR-SEBS | <i>E</i>     | 0.5°               | Daily               | 1984–2007     | Satellite-based | Vinukollu et al. (2011)         |
| SRB-CFSR-PM   | <i>E</i>     | 0.5°               | Daily               | 1984–2007     | Satellite-based | Vinukollu et al. (2011)         |
| SRB-CFSR-PT   | <i>E</i>     | 0.5°               | Daily               | 1984–2007     | Satellite-based | Vinukollu et al. (2011)         |
| VIC           | <i>Q</i>     | 0.25°              | 3h                  | 1948-2010     | Model           | Sheffield and Wood (2007)       |
| VIC           | $\Delta$ TWS | 0.25°              | 3h                  | 1948-2010     | Model           | Sheffield and Wood (2007)       |
| GRACE         | $\Delta$ TWS | 1°                 | Monthly             | 2002-present  | Satellite-based | Landerer and Swenson (2012)     |

**Table S5.** Compiled from Munier and Aires (2018).  $P$  is precipitation,  $E$  is evapotranspiration,  $Q$  is runoff, and  $\Delta$  TWS is changes in total water storage.

| Name   | Variable     | Spatial Resolution | Temporal Resolution | Record Length | Data Type       | Reference(s)                                                                  |
|--------|--------------|--------------------|---------------------|---------------|-----------------|-------------------------------------------------------------------------------|
| TMPA   | $P$          | $0.25^\circ$       | Monthly             | 1998-2019     | Satellite-based | Huffman et al. (2007)                                                         |
| CMORPH | $P$          | $0.25^\circ$       | Daily               | 1998-present  | Satellite-based | Sheffield et al. (2006)                                                       |
| NRL    | $P$          | $0.25^\circ$       | 12h                 | 2003-2010     | Satellite-based | Turk et al. (2010)                                                            |
| GPCP   | $P$          | $2.5^\circ$        | Monthly             | 1979-present  | Satellite-based | Schneider et al. (2014)                                                       |
| GLEAM  | $E$          | $0.25^\circ$       | 3h                  | 1980-2011     | Satellite-based | Gonzalez Miralles et al. (2011)                                               |
| MOD16  | $E$          | 1km                | 8-day               | 2000-2012     | Satellite-based | Mu et al. (2007)                                                              |
| NTSG   | $E$          | 8km                | Daily               | 1983-2006     | Satellite-based | Zhang et al. (2010)                                                           |
| CSR    | $\Delta$ TWS | Basin              | Monthly             | 2002-present  | Satellite-based | <a href="http://grace.jpl.nasa.gov/data/">http://grace.jpl.nasa.gov/data/</a> |
| GFZ    | $\Delta$ TWS | Basin              | Monthly             | 2002-present  | Satellite-based | <a href="http://grace.jpl.nasa.gov/data/">http://grace.jpl.nasa.gov/data/</a> |
| JPL    | $\Delta$ TWS | Basin              | Monthly             | 2002-present  | Satellite-based | <a href="http://grace.jpl.nasa.gov/data/">http://grace.jpl.nasa.gov/data/</a> |
| GRGS   | $\Delta$ TWS | Basin              | Monthly             | 2002-present  | Satellite-based | <a href="http://grgs.obs-mip.fr/grace/">http://grgs.obs-mip.fr/grace/</a>     |
| GRDC   | $Q$          | Basin              | Monthly             | 1900-present  | Station         | <a href="http://www.grdc.sr.unh.edu/">http://www.grdc.sr.unh.edu/</a>         |

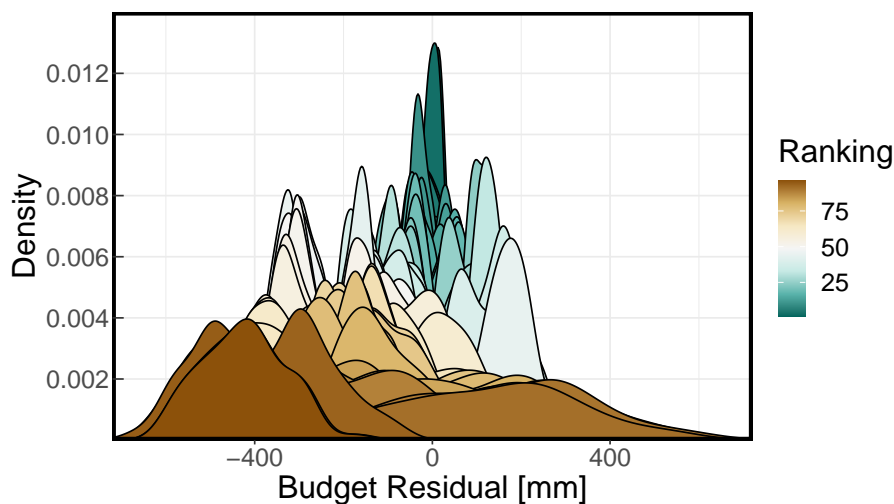

**Figure S2.** Empirical distribution of all possible 96 data set combinations colored based on their ranking as determined by Equation 3. The color gradient goes from higher ranked combinations colored in shades green to lower ranked combinations colored in shades of brown.

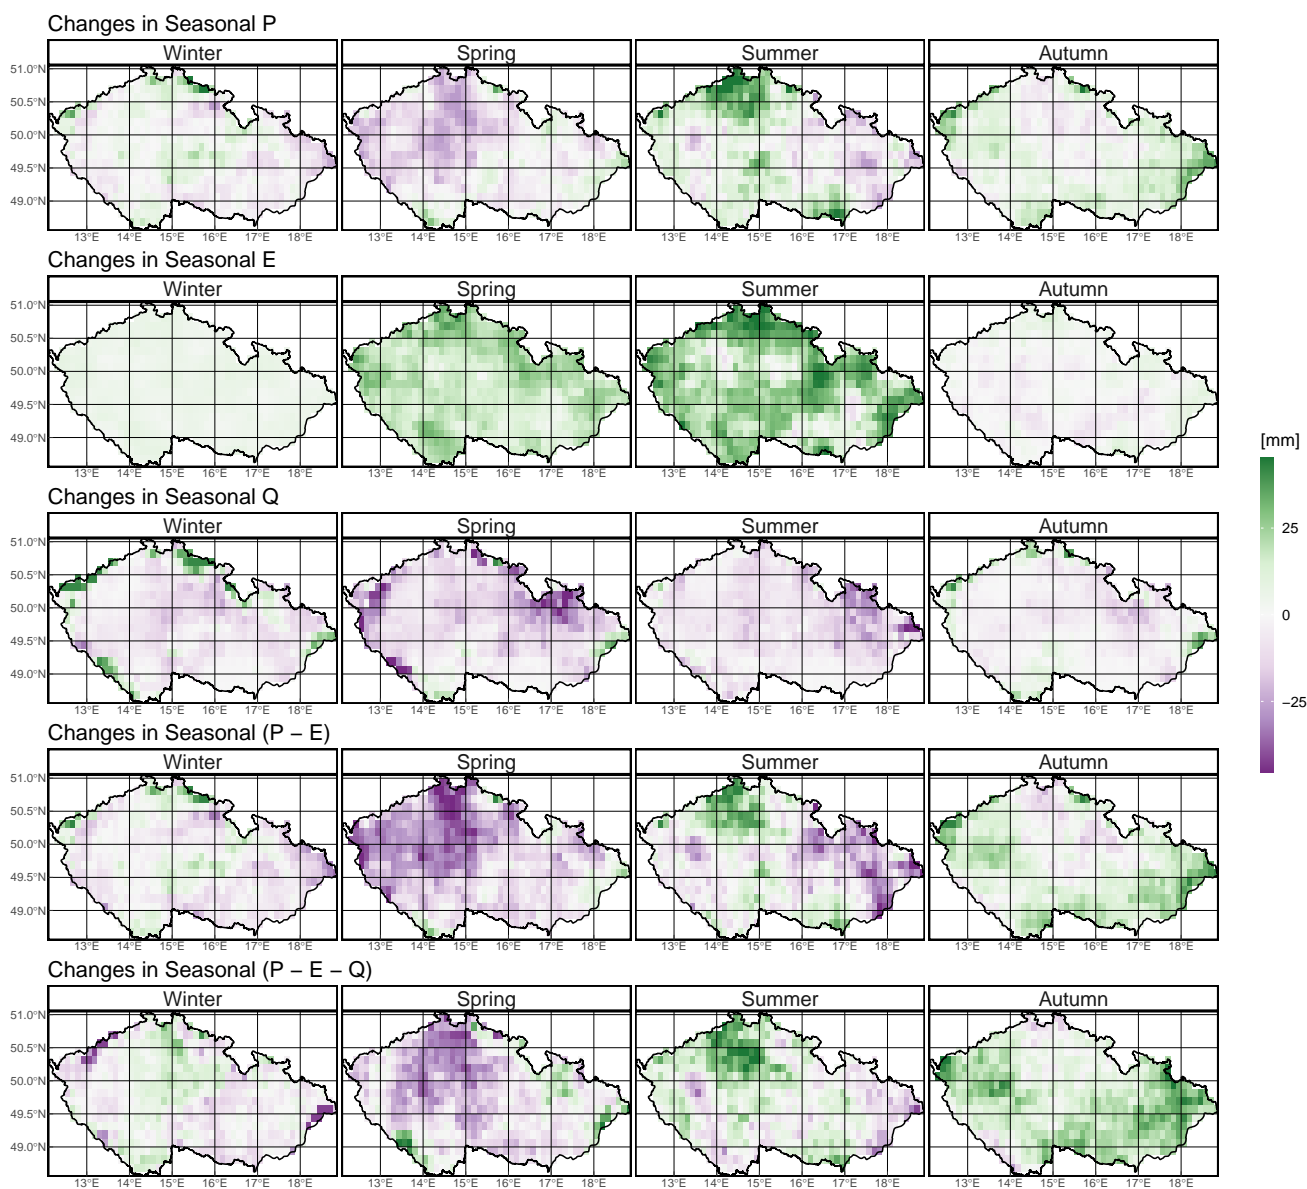

**Figure S3.** mHM spatial pattern of changes in seasonal median water fluxes over Czechia between two 30-year periods: 1961-1990 and 1991-2020. I.e., the value of each grid cell is equal to the seasonal median value of 1991-2020 minus the seasonal median value of 1961-1990.  $P$  is precipitation,  $E$  is evapotranspiration, and  $Q$  is runoff. The seasons are defined as follows: winter as December, January, and February; spring as March, April, and May; summer as June, July, and August; autumn as September, October, and November.

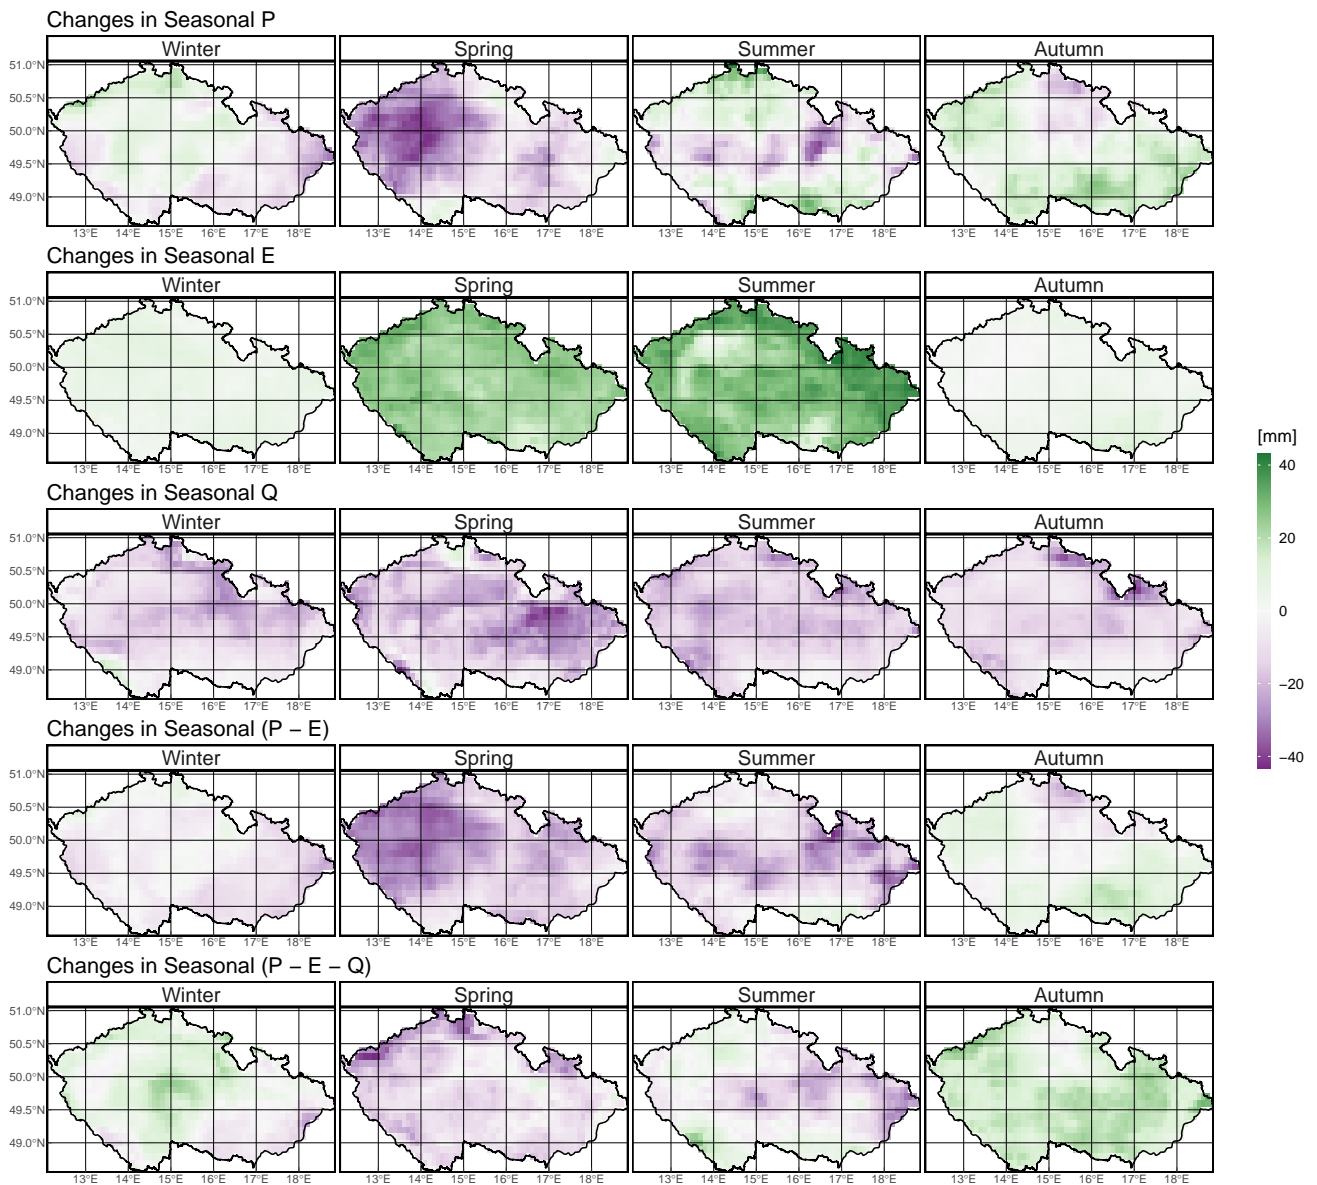

**Figure S4.** ERA5-Land spatial pattern of changes in seasonal median water fluxes over Czechia between two 30-year periods: 1961-1990 and 1991-2020. I.e., the value of each grid cell is equal to the seasonal median value of 1991-2020 minus the seasonal median value of 1961-1990.  $P$  is precipitation,  $E$  is evapotranspiration, and  $Q$  is runoff. The seasons are defined as follows: winter as December, January, and February; spring as March, April, and May; summer as June, July, and August; autumn as September, October, and November.

## References

- Adler, R. F., Huffman, G. J., Chang, A., Ferraro, R., Xie, P.-P., Janowiak, J., Rudolf, B., Schneider, U., Curtis, S., and Bolvin, D.: The version-2 global precipitation climatology project (GPCP) monthly precipitation analysis (1979–present), *Journal of hydrometeorology*, 4, 1147–1167, 2003.
- 5 Bosilovich, M. G., Robertson, F. R., and Chen, J.: Global energy and water budgets in MERRA, *Journal of Climate*, 24, 5721–5739, 2011.
- Bytheway, J. L. and Kummerow, C. D.: Inferring the uncertainty of satellite precipitation estimates in data-sparse regions over land, *Journal of Geophysical Research: Atmospheres*, 118, 9524–9533, publisher: Wiley Online Library, 2013.
- Chen, M., Xie, P., Janowiak, J. E., and Arkin, P. A.: Global land precipitation: A 50-yr monthly analysis based on gauge observations, *Journal of Hydrometeorology*, 3, 249–266, 2002.
- 10 Funk, C. C., Peterson, P. J., Landsfeld, M. F., Pedreros, D. H., Verdin, J. P., Rowland, J. D., Romero, B. E., Husak, G. J., Michaelsen, J. C., and Verdin, A. P.: A quasi-global precipitation time series for drought monitoring, *US Geological Survey Data Series*, 832, 1–12, 2014.
- Gonzalez Miralles, D., Holmes, T., De Jeu, R., Gash, J., Meesters, A., and Dolman, A.: Global land-surface evaporation estimated from satellite-based observations, *Hydrology and Earth System Sciences*, pp. 453–469, 2011.
- Hong, Y., Hsu, K.-L., Sorooshian, S., and Gao, X.: Precipitation estimation from remotely sensed imagery using an artificial neural network cloud classification system, *Journal of Applied Meteorology*, 43, 1834–1853, 2004.
- 15 Huffman, G. J., Bolvin, D. T., Nelkin, E. J., Wolff, D. B., Adler, R. F., Gu, G., Hong, Y., Bowman, K. P., and Stocker, E. F.: The TRMM multisatellite precipitation analysis (TMPA): Quasi-global, multiyear, combined-sensor precipitation estimates at fine scales, *Journal of hydrometeorology*, 8, 38–55, 2007.
- Huffman, G. J., Adler, R. F., Bolvin, D. T., and Gu, G.: Improving the global precipitation record: GPCP version 2.1, *Geophysical Research Letters*, 36, 2009.
- 20 Huffman, G. J., Adler, R. F., Bolvin, D. T., and Nelkin, E. J.: The TRMM multi-satellite precipitation analysis (TMPA), in: *Satellite rainfall applications for surface hydrology*, pp. 3–22, Springer, 2010.
- Joyce, R. J., Janowiak, J. E., Arkin, P. A., and Xie, P.: CMORPH: A method that produces global precipitation estimates from passive microwave and infrared data at high spatial and temporal resolution, *Journal of hydrometeorology*, 5, 487–503, 2004.
- 25 Jung, M., Reichstein, M., Ciais, P., Seneviratne, S. I., Sheffield, J., Goulden, M. L., Bonan, G., Cescatti, A., Chen, J., de Jeu, R., Dolman, A. J., Eugster, W., Gerten, D., Gianelle, D., Gobron, N., Heinke, J., Kimball, J., Law, B. E., Montagnani, L., Mu, Q., Mueller, B., Oleson, K., Papale, D., Richardson, A. D., Rouspard, O., Running, S., Tomelleri, E., Viovy, N., Weber, U., Williams, C., Wood, E., Zaehle, S., and Zhang, K.: Recent decline in the global land evapotranspiration trend due to limited moisture supply, *Nature*, 467, 951–954, <https://doi.org/10.1038/nature09396>, number: 7318 Publisher: Nature Publishing Group, 2010.
- 30 Landerer, F. W. and Swenson, S.: Accuracy of scaled GRACE terrestrial water storage estimates, *Water resources research*, 48, publisher: Wiley Online Library, 2012.
- Mitchell, T. D. and Jones, P. D.: An improved method of constructing a database of monthly climate observations and associated high-resolution grids, *International Journal of Climatology: A Journal of the Royal Meteorological Society*, 25, 693–712, publisher: Wiley Online Library, 2005.
- 35 Mu, Q., Heinsch, F. A., Zhao, M., and Running, S. W.: Development of a global evapotranspiration algorithm based on MODIS and global meteorology data, *Remote sensing of Environment*, 111, 519–536, publisher: Elsevier, 2007.
- Munier, S. and Aires, F.: A new global method of satellite dataset merging and quality characterization constrained by the terrestrial water budget, *Remote Sensing of Environment*, 205, 119–130, publisher: Elsevier, 2018.
- Pan, M., Sahoo, A. K., Troy, T. J., Vinukollu, R. K., Sheffield, J., and Wood, E. F.: Multisource estimation of long-term terrestrial water budget for major global river basins, *Journal of Climate*, 25, 3191–3206, 2012.
- 40 Reichle, R.: The MERRA-land data product (version 1.2), *GMAO Off. Note*, 3, 2012.
- Rienecker, M. M., Suarez, M. J., Gelaro, R., Todling, R., Bacmeister, J., Liu, E., Bosilovich, M. G., Schubert, S. D., Takacs, L., and Kim, G.-K.: MERRA: NASA’s modern-era retrospective analysis for research and applications, *Journal of climate*, 24, 3624–3648, 2011.
- Rodell, M., Beaudoin, H. K., L’Ecuyer, T., Olson, W. S., Famiglietti, J. S., Houser, P. R., Adler, R., Bosilovich, M. G., Clayson, C. A., Chambers, D., and others: The observed state of the water cycle in the early twenty-first century, *Journal of Climate*, 28, 8289–8318, 2015.
- Roderick, M., Sun, F., Lim, W. H., and Farquhar, G.: A general framework for understanding the response of the water cycle to global warming over land and ocean, *Hydrology and Earth System Sciences*, 18, 1575–1589, publisher: Copernicus GmbH, 2014.
- Sahoo, A. K., Pan, M., Troy, T. J., Vinukollu, R. K., Sheffield, J., and Wood, E. F.: Reconciling the global terrestrial water budget using satellite remote sensing, *Remote Sensing of Environment*, 115, 1850–1865, publisher: Elsevier, 2011.
- 50 Schneider, U., Becker, A., Finger, P., Meyer-Christoffer, A., Rudolf, B., and Ziese, M.: GPCC full data reanalysis version 6.0 at 0.5: monthly land-surface precipitation from rain-gauges built on GTS-based and historic data, *GPCC Data Rep.*, doi, 10, 2011.



- Schneider, U., Becker, A., Finger, P., Meyer-Christoffer, A., Ziese, M., and Rudolf, B.: GPCP's new land surface precipitation climatology based on quality-controlled in situ data and its role in quantifying the global water cycle, *Theoretical and Applied Climatology*, 115, 15–40, publisher: Springer, 2014.
- 55 Sheffield, J. and Wood, E. F.: Characteristics of global and regional drought, 1950–2000: Analysis of soil moisture data from off-line simulation of the terrestrial hydrologic cycle, *Journal of Geophysical Research: Atmospheres*, 112, publisher: Wiley Online Library, 2007.
- Sheffield, J., Goteti, G., and Wood, E. F.: Development of a 50-year high-resolution global dataset of meteorological forcings for land surface modeling, *Journal of climate*, 19, 3088–3111, 2006.
- 60 Sheffield, J., Wood, E. F., and Munoz-Arriola, F.: Long-Term Regional Estimates of Evapotranspiration for Mexico Based on Downscaled ISCCP Data, *Journal of Hydrometeorology*, 11, 253–275, <https://doi.org/10.1175/2009JHM1176.1>, publisher: American Meteorological Society Section: *Journal of Hydrometeorology*, 2010.
- Simmons, A.: ERA-Interim: New ECMWF reanalysis products from 1989 onwards, *ECMWF newsletter*, 110, 25–36, 2006.
- Swenson, S. and Wahr, J.: Estimating Large-Scale Precipitation Minus Evapotranspiration from GRACE Satellite Gravity Measurements, *Journal of Hydrometeorology*, 7, 252–270, <https://doi.org/10.1175/JHM478.1>, publisher: American Meteorological Society Section: *Journal of Hydrometeorology*, 2006.
- 65 Turk, J. T., Mostovoy, G. V., and Anantharaj, V.: The NRL-blend high resolution precipitation product and its application to land surface hydrology, in: *Satellite Rainfall Applications for Surface Hydrology*, pp. 85–104, Springer, 2010.
- Vinukollu, R. K., Wood, E. F., Ferguson, C. R., and Fisher, J. B.: Global estimates of evapotranspiration for climate studies using multi-sensor remote sensing data: Evaluation of three process-based approaches, *Remote Sensing of Environment*, 115, 801–823, 2011.
- 70 Willmott, C. J. and Matsuura, K.: *Terrestrial Air Temperature and Precipitation: Monthly and Annual Time Series (1950 - 1999)*, University of Delaware, 2001.
- Zhang, K., Kimball, J. S., Nemani, R. R., and Running, S. W.: A continuous satellite-derived global record of land surface evapotranspiration from 1983 to 2006, *Water Resources Research*, 46, publisher: Wiley Online Library, 2010.
- 75 Zhang, Y., Pan, M., and Wood, E. F.: On creating global gridded terrestrial water budget estimates from satellite remote sensing, in: *Remote Sensing and Water Resources*, pp. 59–78, Springer, 2016.
